# Supplementary material
Source: publisher site journal article supplement (https://www.spandidos-publications.com/7243/downloadSupplementary)

Figure S1. mRNA expression levels of GADD45 $\beta$  and GADD45 $\gamma$ . mRNA expression levels of (A) GADD45 $\beta$  and (B) GADD45 $\gamma$  in MHCC-97H and Huh7 cells were assessed by reverse transcription-quantitative PCR analysis. Data are presented as the mean  $\pm$  SD (n=3). \*\*P<0.01. GADD45 $\beta$ , growth arrest and DNA damage inducible  $\beta$ ; GADD45 $\gamma$ , growth arrest and DNA damage inducible  $\gamma$ .

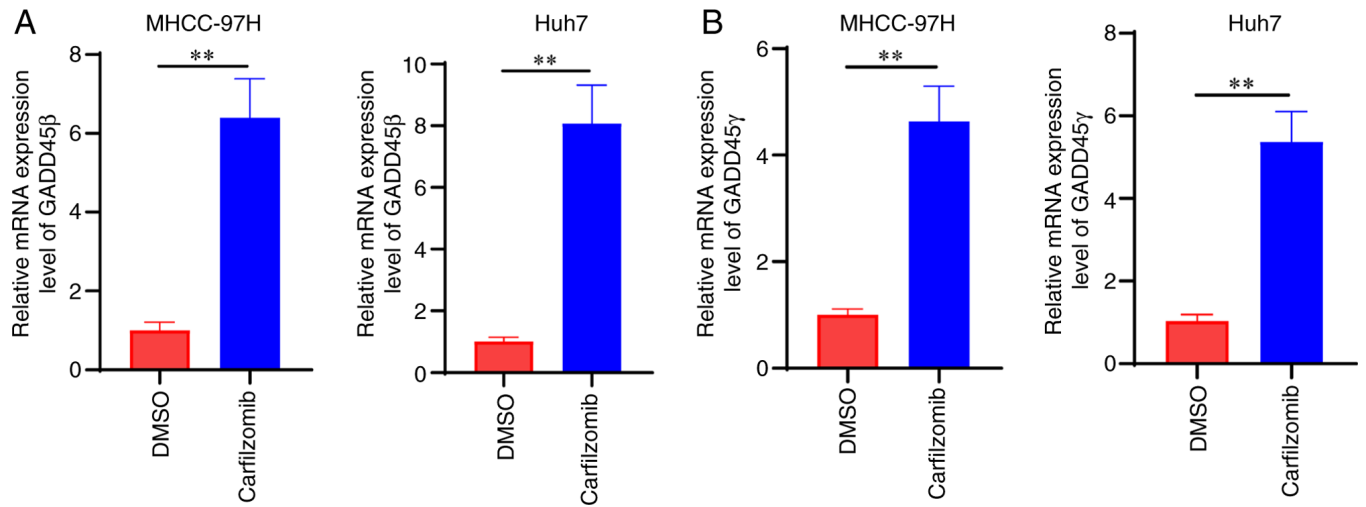

Figure S2. Silencing efficiency of GADD45 $\alpha$  shRNAs assessed by western blotting. GADD45 $\alpha$  protein expression level in (A) MHCC-97H and (B) Huh7 cells after transfection with NC and three shRNAs targeting GADD45 $\alpha$ . Based on the expression of the GADD45 $\alpha$  protein, the silencing of sh2 was the most significant and was used for the subsequent experiments. Data are presented as the mean  $\pm$  SD (n=3). \*\*P<0.01. GADD45 $\alpha$ , growth arrest and DNA damage inducible  $\alpha$ ; NC, negative control; sh, short hairpin.

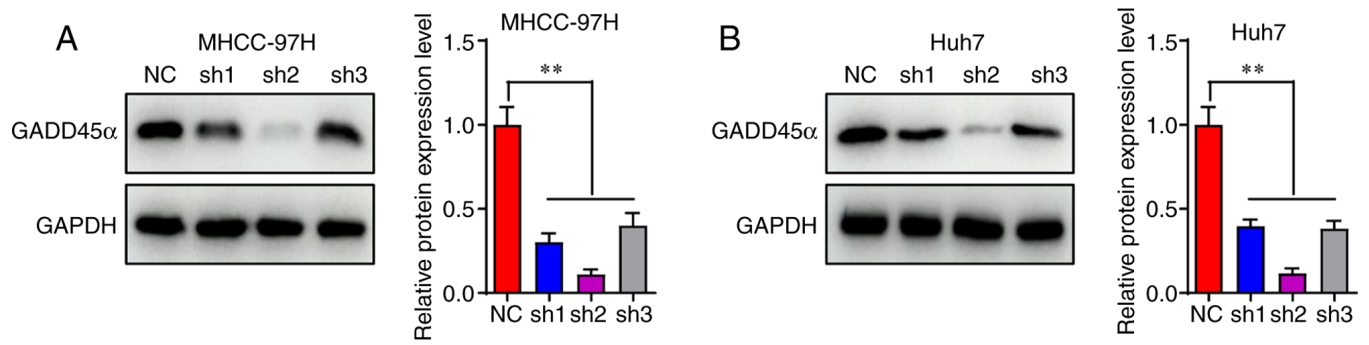

Supplement: Supplementary file 1 [file downloadSupplementary]
